# Supplementary figures and images for: A 14-Day Double-Blind, Randomized, Controlled Cross-Over Intervention Study With Anti-bacterial Benzyl Isothiocyanate From Nasturtium (Tropaeolum majus) on Human Gut Microbiome and Host Defense
Source: Preprints.org preprint supplement (doi:10.20944/preprints202311.1263.v1), 2023-11-21

Supplementary Figure S1:

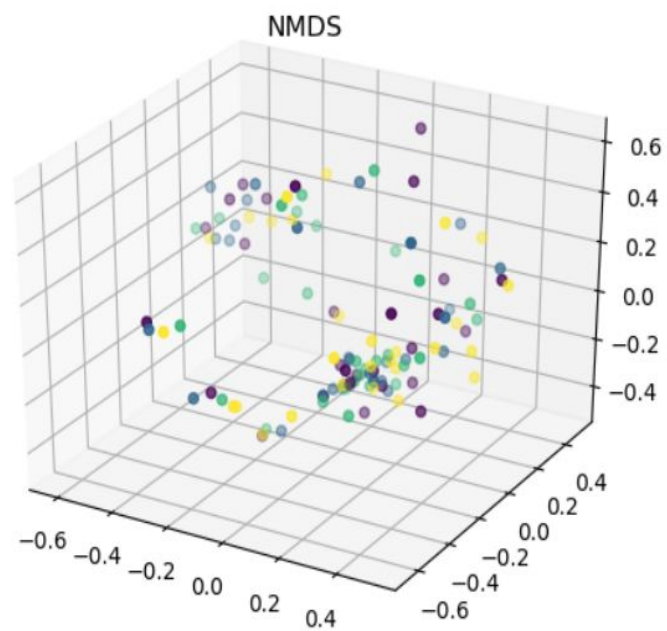

Supplementary Figure S2:

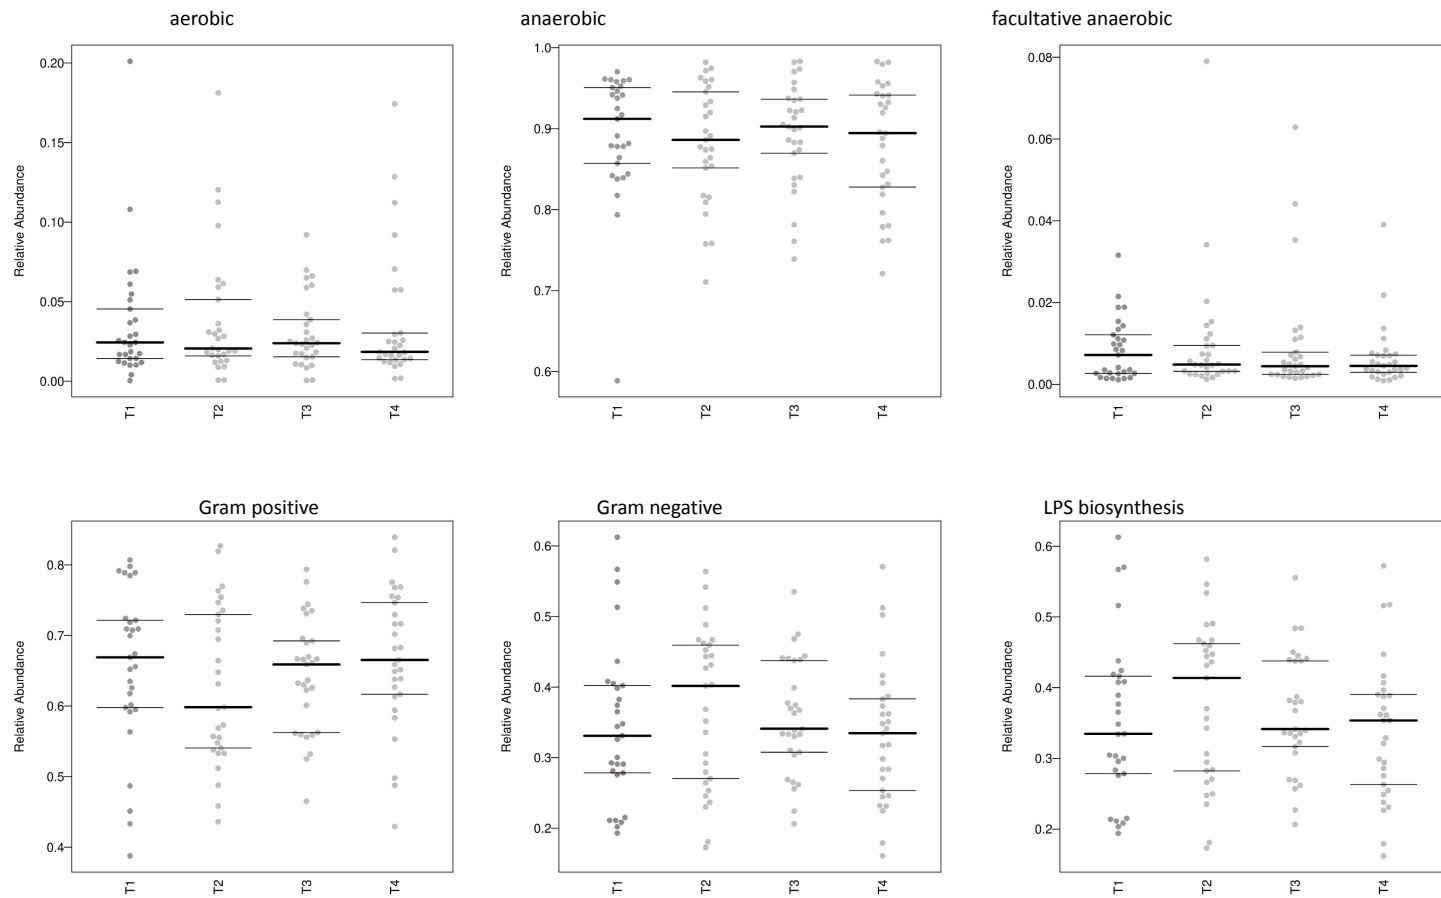

# Supplementary Figure S3:

A

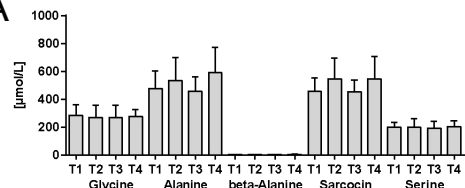

B

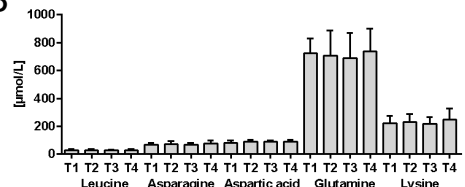

C

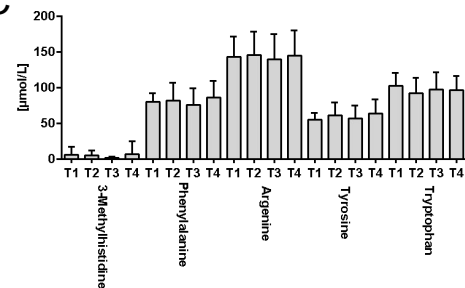

D

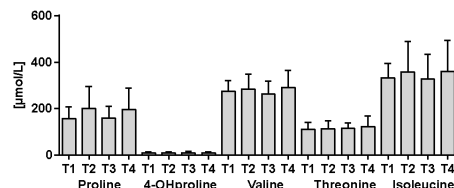

E

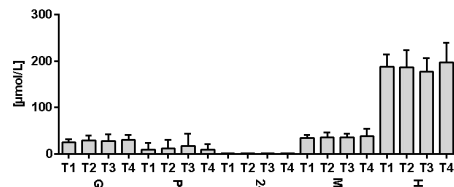

F

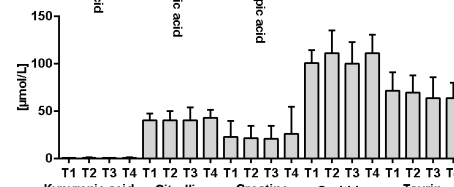

G

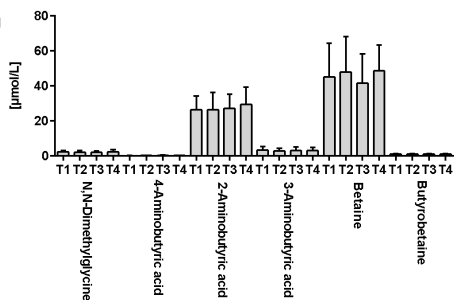

H

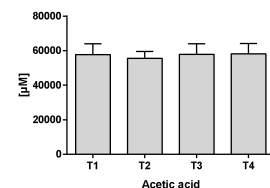

I

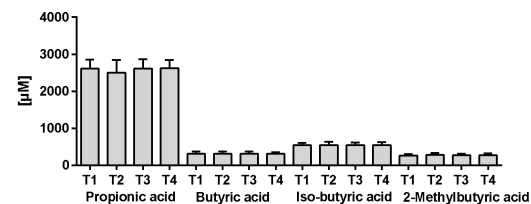

J

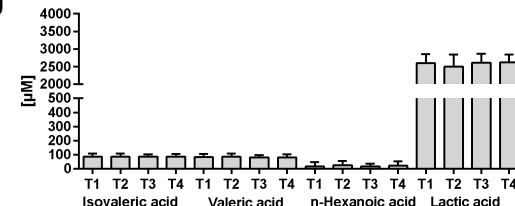

## A

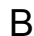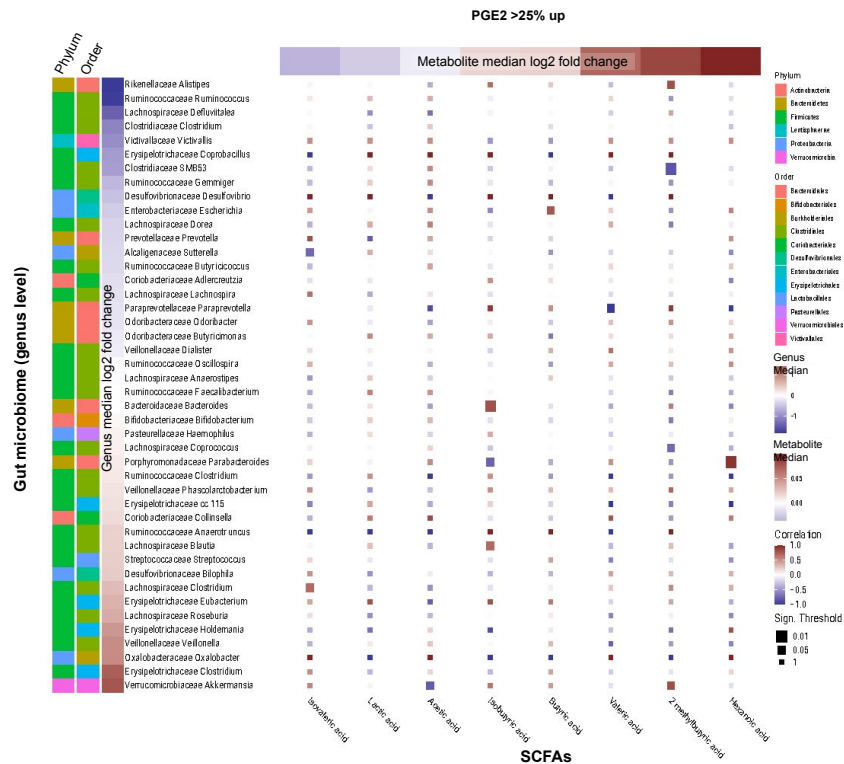

Supplement: Supplementary file 1 [file supplementary]
